# Supplementary material
Source: Springer Nature journal article supplement (https://www.springermedizin.de/resource/supplementary/12889_2012_5594_MOESM2_ESM.pdf/9495740)

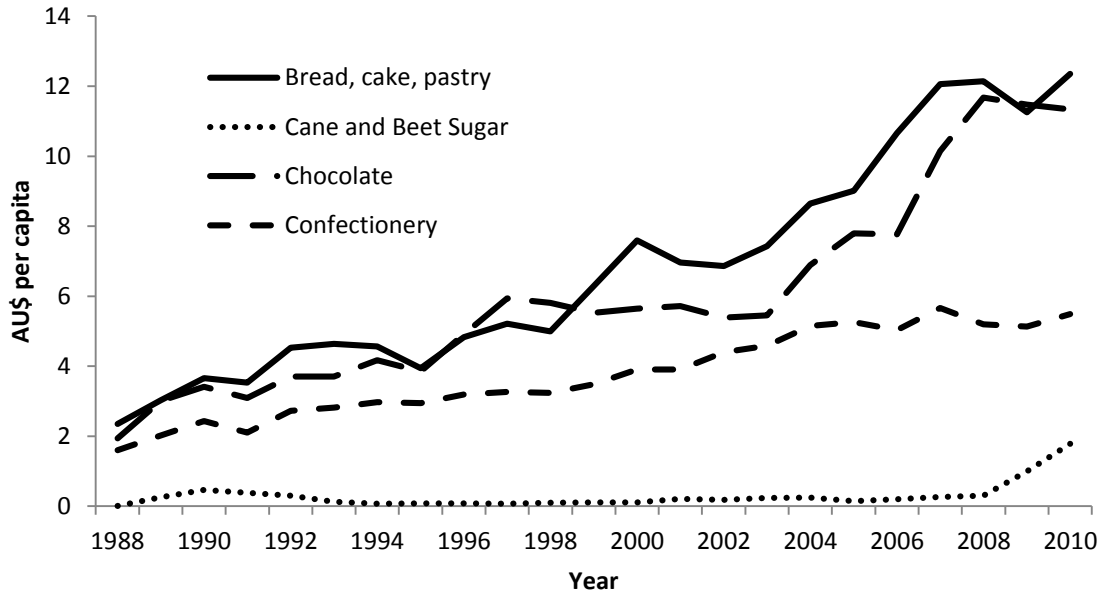

Note: Values have been deflated to represent constant 1988 prices

Supplement: MOESM2 [file 9495740]
